# Supplementary material
Source: Springer Nature journal article supplement (https://www.springermedizin.de/resource/supplementary/12874_2007_230_MOESM2_ESM.pdf/9434040)
Supplement: MOESM2 [file 9434040]

Health research includes any type of research that will directly or indirectly improve health, health care delivery, or treatment. The following questions concern two different types of health research: educational interventions and intervention evaluation surveys.

**EDUCATIONAL INTERVENTION SESSIONS:**

Educational research provides you with information about health or illness, or teaches ways to improve you or your family member’s medical condition.

How many **educational sessions** would you be willing to participate **per year**, if offered once per week under each of the following settings? (Please circle one number for each)

| Location                                          | Number of Educational Sessions per Year |   |   |   |   |   |
|---------------------------------------------------|-----------------------------------------|---|---|---|---|---|
|                                                   | a) In the hospital with a group         | 8 | 6 | 4 | 2 | 1 |
| b) In the hospital one-on-one with the researcher | 8                                       | 6 | 4 | 2 | 1 | 0 |
| c) With the research coming to your home          | 8                                       | 6 | 4 | 2 | 1 | 0 |

Assuming you are willing to participate in at least one education intervention, how many **minutes** would you be willing spend to participate **in one educational session** under each of the following settings? (Please circle one number for each)

| Location                                          | Number of Minutes of Each Educational Sessions |     |    |    |    |
|---------------------------------------------------|------------------------------------------------|-----|----|----|----|
|                                                   | a) In the hospital with a group                | 120 | 90 | 60 | 30 |
| b) In the hospital one-on-one with the researcher | 120                                            | 90  | 60 | 30 | 0  |
| c) With the research coming to your home          | 120                                            | 90  | 60 | 30 | 0  |

**INTERVENTION EVALUATION SURVEYS:**

A follow-up evaluation survey allows you to give us feedbacks regarding the education intervention, and helps us to develop and improve the programs.

Assuming you have participated in at least one or more intervention session(s), how many **evaluation surveys** are you willing to complete **per year** in each of these situations? (Please circle one number for each)

| Location                                        | Number of Minutes of Each Educational Sessions |    |   |   |   |   |
|-------------------------------------------------|------------------------------------------------|----|---|---|---|---|
|                                                 | a) In the hospital                             | 12 | 6 | 4 | 2 | 1 |
| b) With the researcher in my home               | 12                                             | 6  | 4 | 2 | 1 | 0 |
| c) By mail survey (postage paid by researchers) | 12                                             | 6  | 4 | 2 | 1 | 0 |
| d) By telephone survey                          | 12                                             | 6  | 4 | 2 | 1 | 0 |
| e) By web-based (internet survey)               | 12                                             | 6  | 4 | 2 | 1 | 0 |

Assuming you are willing to complete at least one or more evaluation survey(s), how many **minutes** would you be willing to spend to complete **in one evaluation survey** in each of these following situations? (Please circle one number for each)

| Location                                        | Number of Minutes per survey |    |    |    |    |    |    |   |
|-------------------------------------------------|------------------------------|----|----|----|----|----|----|---|
|                                                 | a) In the hospital           | 60 | 50 | 40 | 30 | 20 | 10 | 5 |
| b) With the researcher in my home               | 60                           | 50 | 40 | 30 | 20 | 10 | 5  | 0 |
| c) By mail survey (postage paid by researchers) | 60                           | 50 | 40 | 30 | 20 | 10 | 5  | 0 |
| d) By telephone survey                          | 60                           | 50 | 40 | 30 | 20 | 10 | 5  | 0 |
| e) By web-based (internet survey)               | 60                           | 50 | 40 | 30 | 20 | 10 | 5  | 0 |
